# Supplementary material
Source: PubMed Central journal article supplement (PMC5862139)
Supplement: NIHMS948566-supplement-Supplement_1.pdf [file NIHMS948566-supplement-Supplement_1.pdf]

| Study ID | CorticalGlobalGMT1 | CerebellumT1 | AntCingT1 | FrontalT1 | LatTempT1 | OccipitalT1 | ParietalT1 | PostCingT1 |
|----------|--------------------|--------------|-----------|-----------|-----------|-------------|------------|------------|
| 12602-01 | 1.024378           | 1.005478     | 1.020816  | 1.051237  | 0.983587  | 1.127448    | 1.129574   | 1.119707   |
| 12602-02 | 0.932022           | 1.004511     | 1.05528   | 1.030909  | 0.862708  | 0.923186    | 0.774018   | 0.844518   |
| 12602-03 | 0.983208           | 1.007595     | 0.985068  | 1.004448  | 0.917186  | 1.074256    | 1.04419    | 1.120472   |
| 12602-06 | 1.012837           | 1.003243     | 0.991237  | 0.998086  | 0.922084  | 1.125559    | 1.081033   | 1.078503   |
| 12602-07 | 0.928656           | 1.006101     | 0.981197  | 0.96182   | 0.851535  | 0.974561    | 0.913086   | 0.975833   |
| 12602-09 | 0.993026           | 1.010554     | 0.979612  | 0.99975   | 0.940527  | 1.107557    | 1.065902   | 1.021264   |
| 12602-12 | 0.955842           | 1.00619      | 1.032957  | 1.077894  | 0.91203   | 0.945061    | 0.975378   | 1.112119   |
| 12602-13 | 1.0406             | 1.004791     | 1.035535  | 1.032279  | 0.981132  | 1.175763    | 1.190835   | 1.195388   |
| 12602-14 | 0.938658           | 1.001709     | 1.079593  | 1.057242  | 0.838344  | 0.906637    | 0.86842    | 0.884086   |
| 12602-15 | 0.968565           | 1.018628     | 0.920241  | 0.922609  | 0.911087  | 1.076675    | 0.965383   | 0.997283   |
| 12602-16 | 0.943481           | 1.006618     | 1.112777  | 1.145304  | 0.83597   | 0.903122    | 0.815945   | 0.828753   |
| 12602-17 | 0.998265           | 1.001858     | 0.976186  | 0.985538  | 0.977586  | 1.046861    | 1.023457   | 0.99728    |
| 12602-19 | 0.955923           | 1.00194      | 1.147317  | 1.129364  | 0.877098  | 0.865721    | 0.786524   | 0.937719   |
| 12602-21 | 0.903384           | 1.002961     | 1.001717  | 1.010185  | 0.836569  | 0.85199     | 0.791213   | 0.872705   |
| 12602-22 | 1.036184           | 1.006874     | 1.108683  | 1.099827  | 0.992795  | 1.138411    | 1.18715    | 1.242265   |

|         |             |             |            |           |             |            |          |           |
|---------|-------------|-------------|------------|-----------|-------------|------------|----------|-----------|
| mean    | 0.974335267 | 1.005936733 | 1.02854773 | 1.0337661 | 0.9093492   | 1.0161872  | 0.974141 | 1.015193  |
| std dev | 0.042303235 | 0.004282203 | 0.06221048 | 0.0612148 | 0.057178019 | 0.11048304 | 0.144517 | 0.1279099 |

| Study ID | CorticalGlobalGMT2 | CerebellumT2 | AntCingT2 | FrontalT2 | LatTempT2 | OccipitalT2 | ParietalT2 | PostCingT2 |
|----------|--------------------|--------------|-----------|-----------|-----------|-------------|------------|------------|
| 12602-01 | 1.011508           | 1.004526     | 1.031276  | 1.050376  | 0.979044  | 1.101842    | 1.107337   | 1.094575   |
| 12602-02 | 0.907058           | 1.00322      | 1.012236  | 0.977081  | 0.851649  | 0.906169    | 0.774951   | 0.790646   |
| 12602-03 | 0.943181           | 1.006949     | 0.956514  | 0.972256  | 0.85835   | 0.962156    | 0.975555   | 1.044622   |
| 12602-06 | 0.94715            | 1.001907     | 0.958966  | 0.958339  | 0.867786  | 1.035946    | 0.980466   | 1.003758   |
| 12602-07 | 0.943614           | 1.005849     | 0.980415  | 0.959346  | 0.850724  | 0.999414    | 0.943077   | 1.009217   |
| 12602-09 | 0.958955           | 1.009172     | 0.939139  | 0.954622  | 0.916281  | 1.079578    | 1.000009   | 0.963983   |
| 12602-12 | 0.960674           | 1.003911     | 1.076716  | 1.100208  | 0.904887  | 0.912218    | 0.99064    | 1.110481   |
| 12602-13 | 0.935602           | 1.005763     | 0.905247  | 0.903611  | 0.854794  | 0.976347    | 1.002366   | 0.955072   |
| 12602-14 | 0.944557           | 1.002985     | 1.120964  | 1.081186  | 0.826338  | 0.886342    | 0.853231   | 0.857196   |
| 12602-15 | 0.916091           | 1.022111     | 0.842736  | 0.857036  | 0.830664  | 0.948624    | 0.848186   | 0.924057   |
| 12602-16 | 0.915042           | 1.0061       | 1.049905  | 1.075231  | 0.822641  | 0.88033     | 0.807946   | 0.779088   |
| 12602-17 | 0.985783           | 1.003206     | 0.964916  | 0.967048  | 0.945494  | 0.995541    | 0.987983   | 0.939057   |

|          |             |             |            |           |             |            |          |           |
|----------|-------------|-------------|------------|-----------|-------------|------------|----------|-----------|
| 12602-19 | 0.943273    | 1.002027    | 1.147631   | 1.114091  | 0.857464    | 0.863823   | 0.77938  | 0.899471  |
| 12602-21 | 0.877543    | 1.003308    | 0.9704     | 0.974919  | 0.807496    | 0.8203     | 0.759236 | 0.821312  |
| 12602-22 | 0.973616    | 1.009697    | 0.987117   | 0.980913  | 0.892904    | 1.064069   | 1.053438 | 1.104083  |
| mean     | 0.944243133 | 1.006048733 | 0.99627853 | 0.9950842 | 0.871101067 | 0.96217993 | 0.924253 | 0.9531079 |
| std dev  | 0.032908828 | 0.00503696  | 0.07989672 | 0.0736962 | 0.048029765 | 0.08446582 | 0.11069  | 0.109853  |

| <b>Study ID</b> | <b>CorticalGMAΔ</b> | <b>CerebellumΔ</b> | <b>AntCingΔ</b> | <b>FrontalΔ</b> | <b>LatTempΔ</b> | <b>OccipitalΔ</b> | <b>ParietalΔ</b> | <b>PostCingΔ</b> |
|-----------------|---------------------|--------------------|-----------------|-----------------|-----------------|-------------------|------------------|------------------|
| 12602-01        | -0.01287            | -0.000952          | 0.01046         | -0.000861       | -0.004543       | -0.025606         | -0.02224         | -0.025132        |
| 12602-02        | -0.024964           | -0.001291          | -0.043044       | -0.053828       | -0.011059       | -0.017017         | 0.000933         | -0.053872        |
| 12602-03        | -0.040027           | -0.000646          | -0.028554       | -0.032192       | -0.058836       | -0.1121           | -0.06864         | -0.07585         |
| 12602-06        | -0.065687           | -0.001336          | -0.032271       | -0.039747       | -0.054298       | -0.089613         | -0.10057         | -0.074745        |
| 12602-07        | 0.014958            | -0.000252          | -0.000782       | -0.002474       | -0.000811       | 0.024853          | 0.029991         | 0.033384         |
| 12602-09        | -0.034071           | -0.001382          | -0.040473       | -0.045128       | -0.024246       | -0.027979         | -0.06589         | -0.057281        |
| 12602-12        | 0.004832            | -0.002279          | 0.043759        | 0.022314        | -0.007143       | -0.032843         | 0.015262         | -0.001638        |
| 12602-13        | -0.104998           | 0.000972           | -0.130288       | -0.128668       | -0.126338       | -0.199416         | -0.18847         | -0.240316        |
| 12602-14        | 0.005899            | 0.001276           | 0.041371        | 0.023944        | -0.012006       | -0.020295         | -0.01519         | -0.02689         |
| 12602-15        | -0.052474           | 0.003483           | -0.077505       | -0.065573       | -0.080423       | -0.128051         | -0.1172          | -0.073226        |
| 12602-16        | -0.028439           | -0.000518          | -0.062872       | -0.070073       | -0.013329       | -0.022792         | -0.008           | -0.049665        |
| 12602-17        | -0.012482           | 0.001348           | -0.01127        | -0.01849        | -0.032092       | -0.05132          | -0.03547         | -0.058223        |
| 12602-19        | -0.01265            | 8.7E-05            | 0.000314        | -0.015273       | -0.019634       | -0.001898         | -0.00714         | -0.038248        |
| 12602-21        | -0.025841           | 0.000347           | -0.031317       | -0.035266       | -0.029073       | -0.03169          | -0.03198         | -0.051393        |
| 12602-22        | -0.062568           | 0.002823           | -0.121566       | -0.118914       | -0.099891       | -0.074342         | -0.13371         | -0.138182        |
| mean            | -0.030092133        | 0.000112           | -0.0322692      | -0.0386819      | -0.038248133    | -0.0540073        | -0.04989         | -0.0620851       |
| std dev         | 0.031679947         | 0.001617787        | 0.05090997      | 0.0446484       | 0.038021083     | 0.0576523         | 0.061658         | 0.0623043        |
| % change        | -3.088478305        | 0.011133901        | -3.1373556      | -3.7418457      | -4.20609963     | -5.3146966        | -5.12114         | -6.115599        |

| <b>PrecunT1</b> | <b>PonsT1</b> |
|-----------------|---------------|
| 1.252772        | 0.85455       |
| 0.851863        | 0.852657      |
| 1.200131        | 0.793931      |
| 1.257412        | 0.90757       |
| 1.090361        | 0.778159      |
| 1.196284        | 0.817631      |
| 0.989494        | 0.825884      |
| 1.388272        | 0.864425      |
| 1.00832         | 0.90454       |
| 1.178184        | 0.823246      |
| 0.832201        | 0.857631      |
| 1.139539        | 0.880322      |
| 0.865119        | 0.887348      |
| 0.989635        | 0.819979      |
| 1.366824        | 0.791076      |

|            |            |
|------------|------------|
| 1.10709407 | 0.84392993 |
| 0.17928013 | 0.04085503 |

| <b>PrecunT2</b> | <b>PonsT2</b> |
|-----------------|---------------|
| 1.224675        | 0.868049      |
| 0.8017          | 0.863987      |
| 1.113153        | 0.783472      |
| 1.129585        | 0.893046      |
| 1.123708        | 0.804128      |
| 1.126294        | 0.826444      |
| 0.995016        | 0.851631      |
| 1.184832        | 0.828297      |
| 1.005547        | 0.928318      |
| 1.044625        | 0.797622      |
| 0.801557        | 0.880815      |
| 1.068124        | 0.89204       |

|          |          |
|----------|----------|
| 0.84357  | 0.911691 |
| 0.925688 | 0.825342 |
| 1.231262 | 0.761786 |

|            |            |
|------------|------------|
| 1.04128907 | 0.84777787 |
| 0.14362271 | 0.04902526 |

| <b>PrecunΔ</b> | <b>PonsΔ</b> |
|----------------|--------------|
| -0.028097      | 0.013499     |
| -0.050163      | 0.011133     |
| -0.086978      | -0.010459    |
| -0.127827      | -0.014524    |
| 0.033347       | 0.025969     |
| -0.06999       | 0.008813     |
| 0.005522       | 0.025747     |
| -0.20344       | -0.036128    |
| -0.002773      | 0.023778     |
| -0.133559      | -0.025624    |
| -0.030644      | 0.023184     |
| -0.071415      | 0.011718     |
| -0.021549      | 0.024343     |
| -0.063947      | 0.005363     |
| -0.135562      | -0.02929     |

|             |            |
|-------------|------------|
| -0.065805   | 0.00384793 |
| 0.06352764  | 0.02155569 |
| -5.94393936 | 0.45595412 |
